# Supplementary material for: Generation and Characterization of a Transgenic Mouse Carrying a Functional Humanβ-Globin Gene with the IVSI-6 Thalassemia Mutation
Source: Hindawi journal article supplement (doi:10.1155/2015/687635), 2015-01-01
Supplement: f1 [file 687635.f1.pdf]

# **Generation and characterization of a transgenic mouse carrying a functional human $\beta$ -globin gene with the IVSI-6 thalassemia mutation**

## **SUPPLEMENTARY MATERIALS**

### **RESULTS**

#### **MEL cells transduced with T9W lentiviral vector produce $\beta$ -globin mRNA.**

We induced with dimethyl sulfoxide (DMSO) murine erythroleukemic cells (MEL), previously transduced with the T9W lentiviral vector carrying the human  $\beta$ -globin gene [31], to produce *in vitro*  $^{\text{mu}}\alpha\text{-globin}_2/{}^{\text{hu}}\beta\text{-globin}_2$  hemoglobin, as a control. Supplementary Figure S1 shows cell proliferation (Figure S1A), erythroid differentiation (Figure S1B) and  $\beta$ -globin mRNA content (Figure S1C) of MEL cells under the different experimental conditions. Only a minimal toxicity is observed in undifferentiated or DMSO-treated cells transduced with T9W (Figure S1A). The transduction with T9W does not interfere with DMSO-induced differentiation (Figure S1B), and T9W alone does not induce differentiation. Panel C of Figure S1 demonstrates that untreated and DMSO-treated cells express murine  $\beta$ -globin mRNA exclusively (Figure S1C, white bars), although to a different extent. Interestingly, some human  $\beta$ -globin mRNA was found in T9W-transduced cells at baseline but to a much higher extent after DMSO induction (Figure S1C, black bars).

## LEGENDS TO SUPPLEMENTARY FIGURES

### **Supplementary Figure S1.**

Effects on MEL cells of treatment with DMSO, infection with T9W lentiviral vector or both: (A) cell proliferation, as cell number/ml; (B) benzidine assay, expressed as percentage of Hb-positive cells; (C) quantitative real-time PCR to identify the expression of human (black bars) and murine (white bars)  $\beta$ -globin transcripts, normalized over control.

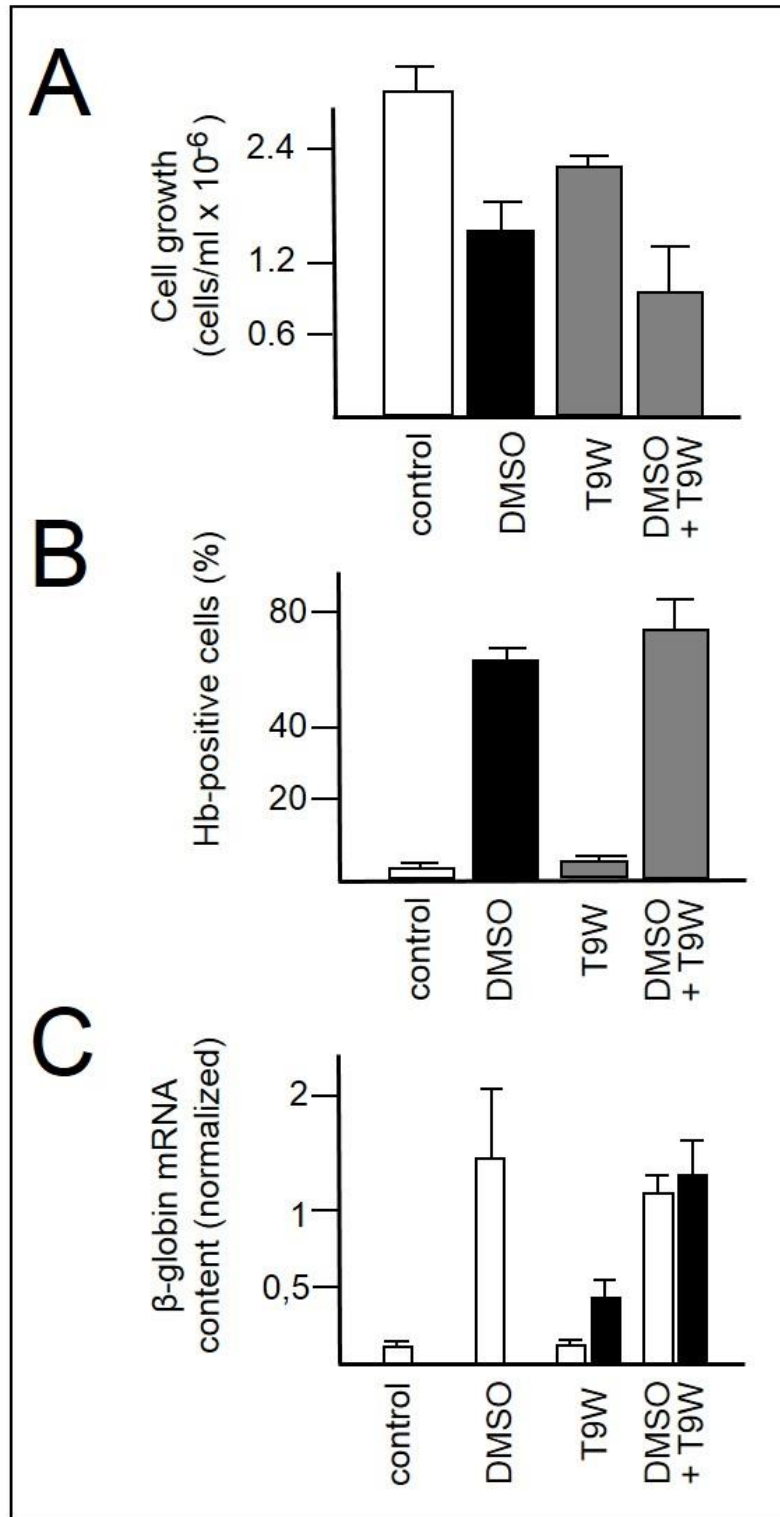

Supplementary Figure S1
